# Supplementary material for: Degassing at the Volcanic/Geothermal System of Kos (Greece): Geochemical Characterization of the Released Gases and CO2 Output Estimation
Source: Hindawi journal article supplement (doi:10.1155/2019/3041037), 2019-06-26
Supplement: f1 [file 3041037.f1.xlsx]

## Sheet: Volcania
POINT	LONGITUDE	LATITUDE	CO2 flux
			g/m2/day
1	26.9954	36.7638	402.106
2	26.9955	36.7638	620.339
3	26.9955	36.7637	20.1517
4	26.9956	36.7638	439.098
5	26.9956	36.7638	175.36
6	26.9956	36.7638	1294.7
7	26.9956	36.7638	167.931
8	26.9956	36.7638	84.7085
9	26.9957	36.7638	387.557
10	26.9957	36.7638	210.03
11	26.9957	36.7638	234.33
12	26.9957	36.7638	95.8214
13	26.9958	36.7638	71.5526
15	26.9956	36.7637	179.694
16	26.9959	36.7638	61.9411
17	26.996	36.7638	316.206
18	26.9961	36.7637	74.6017
19	26.996	36.7637	87.2314
20	26.9959	36.7637	63.04
21	26.9958	36.7637	137.657
22	26.9957	36.7637	180.623
23	26.9957	36.7637	828.512
24	26.9956	36.7637	1078.16
25	26.9955	36.7637	74.1683
26	26.9955	36.7637	978.489
27	26.9955	36.7637	1583.35
28	26.9954	36.7637	3039.79
29	26.9954	36.7636	2821.55
30	26.9954	36.7636	1722.65
31	26.9955	36.7636	62.7614
32	26.9955	36.7638	2676.06
33	26.9955	36.7637	6986.56
34	26.9954	36.7637	233.401
35	26.9953	36.7637	523.605
36	26.9953	36.7637	248.724
37	26.9952	36.7637	79.3533
38	26.9951	36.7637	294.692
39	26.9955	36.7638	1195.79
40	26.9956	36.7638	273.643
41	26.9956	36.7638	399.165
42	26.9957	36.7638	90.3578
43	26.9958	36.7638	106.269
44	26.9959	36.7638	351.34
45	26.9957	36.7639	167.776
46	26.9957	36.7639	518.962
47	26.9956	36.7639	107.12
48	26.9956	36.7639	350.102
50	26.9976	36.7649	564.156
51	26.9972	36.7649	1812.42
52	26.9971	36.765	10178
53	26.997	36.765	717.693
54	26.9969	36.765	2077.08
55	26.9968	36.765	300.574
56	26.9969	36.7649	1748.96
57	26.997	36.7649	5912.42
58	26.9971	36.7649	1371.15
59	26.9971	36.7649	1725.74
60	26.9972	36.7648	443.741
61	26.9973	36.7648	120.245
62	26.9973	36.7647	317.444
63	26.9971	36.7647	675.13
64	26.997	36.7647	187.433
65	26.997	36.7648	3805.92
66	26.9969	36.7648	191.767
67	26.9968	36.7648	193.16
68	26.9967	36.7648	346.851
69	26.9967	36.7647	247.331
70	26.9968	36.7647	1159.89
71	26.9969	36.7647	84.6466
72	26.997	36.7646	615.077
73	26.997	36.7646	75.5149
74	26.9971	36.7645	249.343
75	26.9971	36.7645	173.039
76	26.997	36.7645	112.119
77	26.997	36.7644	468.35
78	26.9971	36.7643	112.816
79	26.9969	36.7645	274.571
80	26.9968	36.7645	73.4254
81	26.9969	36.7644	1418.05
82	26.9968	36.7644	57.0347
83	26.9968	36.7643	809.475
84	26.9968	36.7642	302.895
85	26.9967	36.7642	386.474
86	26.9966	36.7642	96.0226
87	26.9966	36.7641	50.6115
88	26.997	36.7636	206.161
89	26.9968	36.7636	145.427
90	26.9969	36.7635	14.7532
91	26.9974	36.7649	159.109
92	26.9975	36.7648	157.097
93	26.9977	36.7648	698.037
94	26.9977	36.7649	117.258
95	26.9976	36.7649	875.1
96	26.9975	36.7649	284.787
97	26.9973	36.7649	223.341
98	26.9972	36.765	1580.26
99	26.9971	36.765	1594.19
100	26.997	36.7651	794.152
101	26.9969	36.7652	2126.61
102	26.9969	36.7652	399.011
103	26.997	36.7652	748.648
104	26.9971	36.7652	427.644
105	26.9973	36.7651	56.6478
106	26.9973	36.765	565.394
107	26.9975	36.765	376.259
108	26.9976	36.765	105.758
109	26.9977	36.7649	228.139
110	26.9978	36.7648	520.045
111	26.9978	36.7649	1447.15
112	26.9978	36.7649	123.186
113	26.9979	36.765	488.316
114	26.9979	36.765	529.951
115	26.998	36.765	406.13
116	26.9979	36.7651	196.255
117	26.9981	36.7651	109.844
118	26.998	36.7651	551.619
119	26.998	36.7651	450.396
120	26.9977	36.7652	11.619
121	26.9978	36.7652	36.8365
122	26.9978	36.7651	92.6175
123	26.9977	36.7651	266.678
124	26.9977	36.7651	15.0194
125	26.9976	36.7651	211.887
126	26.9974	36.7651	317.289
127	26.9973	36.7651	87.7421
128	26.9972	36.7652	1832.54
129	26.9971	36.7652	2651.3
130	26.9969	36.7653	4209.89
131	26.997	36.7653	792.45
132	26.9971	36.7653	445.289
133	26.9972	36.7653	1035.29
134	26.9973	36.7653	3152.77
135	26.9975	36.7652	88.9339
136	26.9974	36.7653	320.23
137	26.9974	36.7653	2018.27
138	26.9973	36.7654	388.95
139	26.9972	36.7655	32.735
140	26.9973	36.7655	23.1234
141	26.9974	36.7655	68.9524
142	26.9974	36.7654	262.963
143	26.9976	36.7654	128.587
144	26.9976	36.7654	28.0762
145	26.9976	36.7655	105.681
146	26.9975	36.7655	103.885
147	26.9975	36.7657	16.0038
148	26.9976	36.7657	26.2963
149	26.9976	36.7657	95.8833
150	26.9977	36.7656	168.86
151	26.9978	36.7655	45.9064
152	26.9978	36.7655	121.003
153	26.9977	36.7656	48.5066
154	26.9979	36.7654	24.2223
155	26.9981	36.7653	188.516
156	26.9981	36.7652	288.037
157	26.9982	36.7651	1245.63
158	26.9983	36.7651	1296.71
159	26.9983	36.7649	380.128
160	26.9984	36.7649	46.3242
161	26.9984	36.765	816.594
162	26.9983	36.7651	1008.05
163	26.9982	36.7652	198.577
164	26.9983	36.7652	382.295
165	26.9984	36.7652	393.284
166	26.9985	36.7651	228.448
167	26.999	36.7658	515.557
168	26.999	36.7657	1171.18
169	26.9991	36.7655	57.6693
170	26.9992	36.7655	303.205
171	26.9992	36.7656	513.544
172	26.9992	36.7658	108.931
173	26.9993	36.7658	357.376
174	26.9993	36.7657	169.789
175	26.9994	36.7655	778.52
176	26.9994	36.7654	4886.26
177	26.9995	36.7653	900.637
178	26.9995	36.7651	186.969
179	26.9996	36.7652	226.901
180	26.9996	36.7653	1055.72
181	26.9996	36.7654	1013.31
182	26.9995	36.7657	3592.33
183	26.9995	36.7658	683.488
184	26.9996	36.7659	3261.12
185	26.9996	36.7658	8956.85
186	26.9997	36.7656	383.069
187	26.9997	36.7655	286.799
188	26.9998	36.7653	135.614
189	26.9999	36.7655	94.6761
190	26.9999	36.7656	210.649
191	26.9998	36.7658	221.483
192	26.9997	36.766	562.299
193	26.9996	36.766	386.474
194	26.9995	36.766	1722.65
195	26.9993	36.7659	532.272
196	26.9992	36.766	189.445
197	26.9994	36.7661	95.0011
198	26.9942	36.763	584.76
199	26.9941	36.763	179.696
200	26.994	36.7629	425.48
201	26.9939	36.7628	232.056
202	26.994	36.7628	278.872
203	26.9941	36.7629	176.836
204	26.9942	36.7629	361.108
205	26.9943	36.763	308
206	26.9943	36.7629	482.68
207	26.9942	36.7629	382.624
208	26.9942	36.7628	1128.16
209	26.9942	36.7627	196.724
210	26.9941	36.7627	42.68
211	26.9939	36.7629	415.668
212	26.9938	36.7629	54.076
213	26.9938	36.7629	36.7708
214	26.994	36.7629	178.552
215	26.994	36.763	84.876
216	26.9942	36.7631	390.148
217	26.9942	36.7632	141.812
218	26.9943	36.7632	33.088
219	26.9957	36.7644	240.284
220	26.9958	36.7644	389.708
221	26.9959	36.7644	453.2
222	26.9961	36.7644	47.52
223	26.9961	36.7645	389.972
224	26.9959	36.7645	1389.96
225	26.9958	36.7645	579.92
226	26.9956	36.7645	110.528
227	26.9957	36.7645	38.1524
228	26.9958	36.7646	229.152
229	26.9959	36.7646	576.84
230	26.9959	36.7647	10.626
231	26.9957	36.7646	25.4804
232	26.9949	36.7648	1448.92
233	26.9949	36.7649	170.236
234	26.9948	36.7648	42.8824
235	26.9949	36.7648	281.072
236	26.995	36.7648	63.052
237	26.9944	36.7646	17.5076
238	26.9943	36.7646	123.728
239	26.9943	36.7645	55.264
240	26.9942	36.7644	119.24
241	26.9941	36.7644	185.856
242	26.9939	36.7644	621.28
243	26.9938	36.7644	1450.24
244	26.9938	36.7645	388.784
245	26.9939	36.7645	63.888
246	26.9939	36.7646	21.8548
247	26.9974	36.7653	2148.29
248	26.9942	36.7631	429.214
249	26.9943	36.7631	51
250	26.9945	36.7634	8.5842
251	26.9943	36.7631	127
252	26.9941	36.7633	50
253	26.9947	36.7635	7.63204
254	26.9942	36.7634	12
255	26.9943	36.7638	8.00987
256	26.9944	36.7636	8
257	26.9941	36.7637	16.1742
258	26.9947	36.7638	3
259	26.994	36.7635	5.71451
260	26.9945	36.764	6
261	26.9944	36.7641	1
262	26.9938	36.7634	96.1313
263	26.9942	36.7642	27
264	26.9939	36.7633	128.344
265	26.9944	36.7644	33
266	26.9941	36.7631	130.415
267	26.9946	36.7643	4
268	26.9941	36.763	337.721
269	26.9948	36.7642	6
270	26.994	36.7629	1268.17
271	26.9939	36.763	30.8831
272	26.995	36.7641	1
273	26.9952	36.7641	22
274	26.9939	36.7631	10.3172
275	26.9938	36.7631	585.301
276	26.9954	36.764	133
277	26.9954	36.7642	75
278	26.9936	36.7633	31.9872
279	26.9952	36.7643	404
280	26.995	36.7644	19
281	26.9935	36.7634	6.8901
282	26.995	36.7646	13
283	26.9935	36.7633	9.04086
284	26.9949	36.7648	804
285	26.9949	36.7649	21
286	26.9935	36.7631	74.6194
287	26.9947	36.765	17
288	26.995	36.765	0.7
289	26.9937	36.763	123.311
290	26.9952	36.7648	0.8
291	26.9938	36.7629	191.315
292	26.9953	36.7647	6
293	26.9939	36.7628	237.288
294	26.9954	36.7645	388
295	26.9953	36.7645	68
296	26.9942	36.7628	861.136
297	26.9953	36.7644	95
298	26.9951	36.7644	473
299	26.9943	36.7628	18.6964
300	26.9953	36.7644	535
301	26.9956	36.7643	172
302	26.9957	36.7643	33
303	26.9959	36.7639	140.949
304	26.9958	36.7642	364
305	26.9961	36.7638	15.6661
306	26.9958	36.7644	257
307	26.9956	36.7646	21
308	26.9962	36.7637	37.6063
309	26.9955	36.7648	3
310	26.9965	36.7639	148.422
311	26.9957	36.7647	4
312	26.9964	36.764	1265.99
313	26.9958	36.7646	139
314	26.9964	36.7642	90.6302
315	26.9959	36.7645	26
316	26.9967	36.764	154.009
317	26.9959	36.7644	397
318	26.9961	36.7644	3
319	26.996	36.7646	439
320	26.9959	36.7648	5
321	26.9962	36.7644	685.52
322	26.9959	36.7649	0.1
323	26.9962	36.7646	231.359
324	26.9962	36.765	33
325	26.9961	36.7649	62.4757
326	26.9964	36.7651	491
327	26.9962	36.765	76.4156
328	26.9966	36.7651	42
329	26.9961	36.7651	3.93782
330	26.9966	36.7653	537
331	26.9963	36.7654	29.0706
332	26.9965	36.7654	3
333	26.9964	36.7652	20.5212
334	26.9966	36.7654	8
335	26.9966	36.7647	247.064
336	26.9966	36.7647	245.251
337	26.9982	36.7655	24.5856
338	26.9976	36.7655	245.008
339	26.9985	36.7653	896.534
340	26.9987	36.7652	97.2956
341	26.9989	36.7652	122.856
342	26.9988	36.7653	85.1579
343	26.9986	36.7653	113.387
344	26.9984	36.7654	26.3437
345	26.9983	36.7656	21.5712
346	26.9985	36.7657	11.6666
347	26.9986	36.7656	4.34
348	26.9986	36.7655	9.24513
349	26.9987	36.7658	39.8835
350	26.9988	36.7657	83.3051
351	26.9989	36.7655	116.81
352	26.999	36.7654	264.701
353	26.9991	36.7653	5.79452
354	26.9992	36.7653	142.794
355	26.9991	36.7654	301.716
356	26.999	36.7656	638.384
357	26.9989	36.7657	365.45
358	26.9988	36.7658	688.317
359	26.999	36.7658	613.253
360	26.9991	36.7657	5062.31
361	26.9992	36.7656	366.414
362	26.9993	36.7654	308.892
363	26.9994	36.7653	711.221
364	26.9996	36.7652	354.305
365	26.9994	36.7651	179.852
366	26.9991	36.7651	8.09455
367	26.999	36.7651	19.3129
368	26.9987	36.7651	27.1337
369	26.9985	36.7651	134.792
370	26.9983	36.7651	1102.61
371	26.9983	36.7649	72.1927
372	26.9986	36.7649	30.2741
373	26.9989	36.7649	72.4565
374	26.9991	36.7649	12.797
375	26.9994	36.765	952.982
376	26.9996	36.7651	225.09
377	26.9999	36.7653	112.833
378	27	36.7651	14.7891
379	26.9998	36.7649	11.5538
380	26.9995	36.7649	5.71418
381	26.9993	36.7648	4.20371
382	26.9995	36.766	3691.61
383	26.9993	36.7659	1559.84
384	26.9991	36.766	585.909
385	26.9994	36.7661	894.173
386	26.9997	36.7662	274.319
387	26.9999	36.7662	88.4341
388	27.0001	36.7661	73.7886
389	26.9999	36.7664	11.5358
390	26.9997	36.7663	59.1387
391	26.9995	36.7662	942.901
392	26.9992	36.7661	681.383
393	26.999	36.766	675.888
394	26.9988	36.7659	558.009
395	26.9986	36.7658	41.4451
396	26.9983	36.7657	12.8025
397	26.9981	36.7656	24.531
398	26.9979	36.7658	10.9023
399	26.9982	36.766	7.39101
400	26.9984	36.7661	11.4882
401	26.9987	36.7662	164.964
402	26.999	36.7663	30.2162
403	26.9992	36.7664	29.7532
404	26.9995	36.7665	99.6678
405	26.9998	36.7666	6.23973
406	26.9996	36.7668	7.44818
407	26.9993	36.7667	11.7765
408	26.999	36.7667	10.5103
409	26.9988	36.7665	15.6393
410	26.9985	36.7664	11.3047
411	26.9994	36.7655	684.937
412	26.9996	36.7658	2735.84
413	26.9999	36.7659	927.568
414	26.9999	36.7658	418
415	27	36.7656	95.3513
416	27.0001	36.7654	11.8722
417	27.0004	36.7653	1.52426
418	27.0004	36.7655	9.91169
419	27.0003	36.7657	16.8169
420	27.0003	36.7659	13.961
421	27.0006	36.7659	12.6335
422	27.0009	36.766	102.319
423	27.0008	36.7662	28.8067
424	27.001	36.766	21.5908
425	27.0009	36.7659	85.5548
426	27.0011	36.7658	111.283
427	27.001	36.7657	9.74517
428	27.0012	36.7657	135.976
429	27.0013	36.7659	20.4027
430	27.0012	36.7661	76.9649
431	27.0011	36.7662	17.6939
432	27.0014	36.7662	116.114
433	27.0015	36.766	436.623
434	27.0016	36.766	36.9202
435	27.0015	36.7658	121.41
436	27.0014	36.7657	189.846
437	27.0013	36.7655	10.0244
438	27.0011	36.7656	16.31
439	27.0009	36.7656	6.42996
440	27.0007	36.7657	96.8008
441	27.0006	36.7656	8.60122
442	27.0005	36.7657	40.6509
443	27.0003	36.7658	19.8482
444	27.0003	36.7655	11.7408
445	26.9992	36.7655	392.087

## Sheet: Kokkinonero
POINT	LONGITUDE	LATITUDE	CO2 flux
			g/m2/day
1	27.2481	36.8551	14285.8
2	27.2481	36.8551	1888.26
3	27.248	36.8551	1340.82
4	27.248	36.855	605.481
5	27.2479	36.8551	9.00947
6	27.2478	36.8551	1174.13
7	27.248	36.8549	1023.37
8	27.248	36.8548	2420.69
9	27.2479	36.8549	7210.98
10	27.2479	36.8547	4036.54
11	27.2479	36.8548	8176.78
12	27.2477	36.8548	2001.24
13	27.2476	36.8548	2912.87
14	27.2475	36.8549	243.616
15	27.2475	36.8551	3.87093
16	27.2477	36.855	104.969
17	27.2477	36.8549	106.563
18	27.2479	36.8547	772.948
19	27.2478	36.8547	235.258
20	27.248	36.8547	104.35
21	27.2482	36.8547	4030.35
22	27.2481	36.8548	1860.4
23	27.2481	36.8548	3983.92
24	27.2481	36.855	2561.53
25	27.2482	36.855	1292.84
26	27.2484	36.855	1767.53
27	27.2484	36.855	14394.1
28	27.2485	36.855	1447.15
29	27.2483	36.8551	23.8664
30	27.2482	36.8551	166.074
31	27.2481	36.8551	1466.96
33	27.2481	36.8552	147.145
35	27.248	36.8552	408.916
36	27.2481	36.8553	392.974
37	27.248	36.8553	45.086
38	27.2483	36.8555	4.83673
39	27.2483	36.8555	32.3326
40	27.2482	36.8555	479.649
41	27.2481	36.8555	363.877
42	27.2481	36.8556	4157.26
43	27.2482	36.8557	75.2672
44	27.2506	36.8553	1987.48
45	27.2506	36.8553	113.564
46	27.2507	36.8552	2.12784
47	27.2505	36.8555	16.4604
48	27.2508	36.8555	6.688
49	27.251	36.8555	2432.76
50	27.2502	36.8566	4.11356
51	27.2502	36.8564	10203.6
52	27.2504	36.8564	344.388
53	27.2505	36.8564	206.14
54	27.2505	36.8563	890.56
55	27.2505	36.8562	3419.24
56	27.2506	36.8561	43.4148
57	27.2506	36.8561	95.656
58	27.2507	36.856	1307.24
59	27.2508	36.856	2105.4
60	27.2506	36.856	179.96
61	27.2505	36.856	321.156
62	27.2504	36.8561	84.744
63	27.2503	36.8562	250.668
64	27.2503	36.8563	840.84
65	27.2504	36.8565	120.472
66	27.2507	36.8559	57.024
67	27.2506	36.8559	204.116
68	27.2506	36.8558	362.692
69	27.2506	36.8559	341.308
70	27.2505	36.856	12.0252
71	27.2504	36.856	165.308
72	27.2504	36.856	115.5
73	27.2506	36.8559	886.16
74	27.2506	36.856	2583.68
75	27.2509	36.8559	3.26216
76	27.2507	36.8557	0.44
77	27.2506	36.8556	7.9112
78	27.2494	36.8571	485.32
79	27.2495	36.8571	97.68
80	27.2496	36.857	36.8368
81	27.2499	36.857	34.584
82	27.2499	36.857	2463.56
83	27.2498	36.857	3902.8
84	27.2498	36.857	604.56
85	27.2498	36.857	169.488
86	27.2497	36.8571	326.04
87	27.2497	36.8571	1003.2
88	27.2497	36.8571	1582.24
89	27.2496	36.8571	25.9732
90	27.2496	36.8572	1661
91	27.2496	36.8572	1544.84
92	27.2496	36.8573	990.88
93	27.2494	36.8573	477.4
94	27.2494	36.8573	416.548
95	27.2493	36.8573	6481.2
96	27.2492	36.8573	982.52
97	27.249	36.8573	345.136
98	27.2492	36.8572	681.56
99	27.2494	36.8571	533.72
100	27.2491	36.8572	8.294
101	27.2493	36.8571	19.4348
102	27.2494	36.857	469.04
103	27.2496	36.8569	9.064
104	27.2501	36.857	6.8332
105	27.25	36.857	47.124
106	27.2499	36.8571	15.3164
107	27.2498	36.8571	58.784
108	27.2497	36.8572	1055.56
109	27.2496	36.8572	667.92
110	27.2497	36.8573	905.96
111	27.2497	36.8574	2312.2
112	27.2498	36.8574	2347.84
113	27.2498	36.8575	1743.28
114	27.2499	36.8575	190.168
115	27.2501	36.8575	107.492
116	27.2502	36.8575	145.596
117	27.2502	36.8576	52.272
118	27.2501	36.8577	1037.52
119	27.2499	36.8576	1612.16
120	27.2517	36.8576	317.152
121	27.2496	36.8575	5671.6
122	27.2495	36.8575	422.576
123	27.2495	36.8575	2.10716
124	27.2479	36.8557	8.7384
125	27.2478	36.8557	207.9
126	27.2477	36.8558	26.0612
127	27.2474	36.8557	53.24
128	27.2456	36.8562	28.0104
129	27.2456	36.8562	11.6556
130	27.2455	36.8562	15.5892
131	27.2456	36.8561	1524.16
132	27.2456	36.8562	12.5576
133	27.2457	36.8562	6.908

## Sheet: Paradise
POINT	LONGITUDE	LATITUDE	CO2 flux
			g/m2/day
1	27.0094	36.7605	26628.8
2	27.0094	36.7605	45892
3	27.0093	36.7605	53152
4	27.0094	36.7605	46728
5	27.0094	36.7605	6208.4
6	27.0095	36.7606	7392
7	27.0095	36.7606	7392
8	27.0093	36.7605	10665.6
9	27.0093	36.7605	27209.6
10	27.0093	36.7606	568.48
11	27.0092	36.7606	8412.8
12	27.0092	36.7606	1655.72

## Sheet: Therma
POINT	LONGITUDE	LATITUDE	CO2 flux
			g/m2/day
1	36.8447	27.3164	134391
2	36.8447	27.3164	41235.4
3	36.8447	27.3165	135680
4	36.8446	27.3164	24067.2
5	36.8446	27.3165	897537
6	36.8446	27.3165	33554.8
7	36.8445	27.3165	16949.2
8	36.8446	27.3166	16229
9	36.8446	27.3166	11015.5
10	36.8446	27.3164	15125.4
11	36.8447	27.3165	818866
12	36.8447	27.3165	123852
13	36.8447	27.3165	76392.6
14	36.8446	27.3164	295424
15	36.8447	27.3166	46513.6
16	36.8447	27.3166	96476.1
17	36.8446	27.3165	11817.8
18	36.8447	27.3168	547.716
19	36.8447	27.3168	30.3135
20	36.8448	27.3165	10581.2
21	36.8448	27.3164	1688.55
22	36.8447	27.3164	3224.49
23	36.8446	27.3164	2883.96
24	36.8447	27.3163	158.086
25	36.8446	27.3161	2090.09
26	36.8447	27.316	13.4115
27	36.8446	27.3159	537.258
28	36.8446	27.3157	324.919
29	36.8446	27.3155	540.984
